# Supplementary material for: Hydrogen bond-dominated polybenzimidazole semi-interpenetrating network membranes for alkaline water electrolysis
Source: Royal Society of Chemistry journal article supplement (doi:10.1039/d3ta05159e), 2023-01-01
Supplement: d3ta05159e1.pdf [file d3ta05159e1.pdf]

## Supporting Information for

### **Hydrogen bond-dominated polybenzimidazole semi-interpenetrating network membranes for alkaline water electrolysis**

Zhi Qiu <sup>a,b</sup>, Lihua Wang <sup>a,\*</sup>, Min He <sup>a</sup>, Pingxia Zhang <sup>a</sup>, Hao Li <sup>a</sup>, Yanbin Yun <sup>b,\*</sup>, Tong Zhao <sup>a</sup>

<sup>a</sup> Key Laboratory of Science and Technology on high-tech polymer materials, Institute of Chemistry, Chinese Academy of Sciences, Beijing, 100190, PR China. \*E-mail: wanglh@iccas.ac.cn

<sup>b</sup> College of Environmental Science and Engineering, Beijing Forestry University, Beijing 100083, PR China. \*E-mail: yunyanbin@bjfu.edu.cn

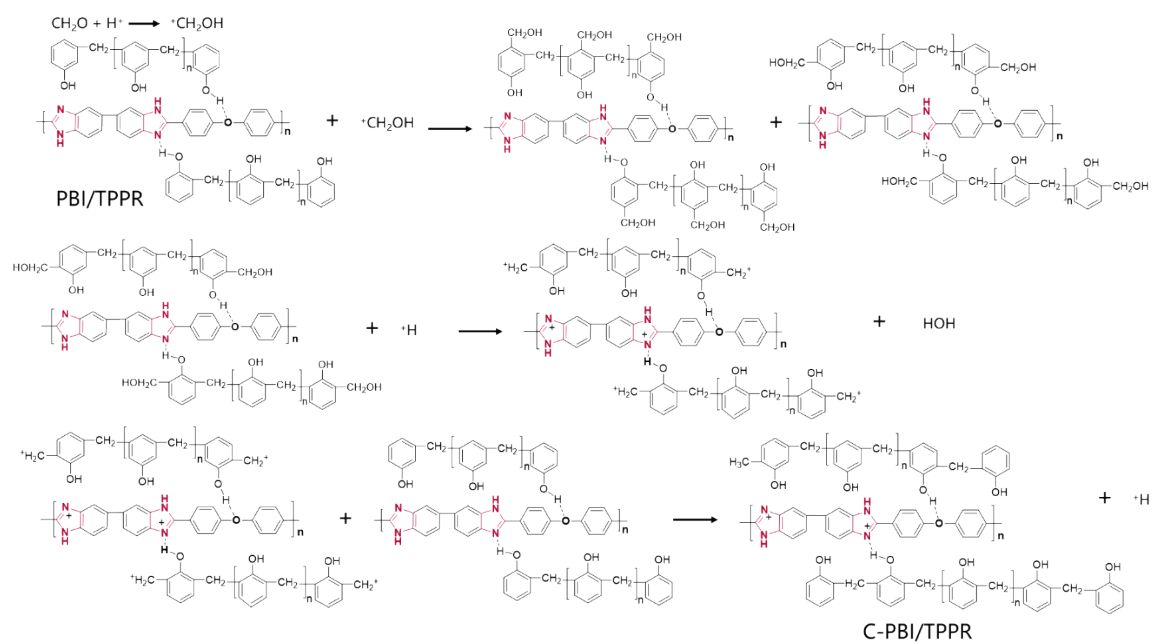

Scheme S1. the route of preparing C-PBI/TPPR membrane

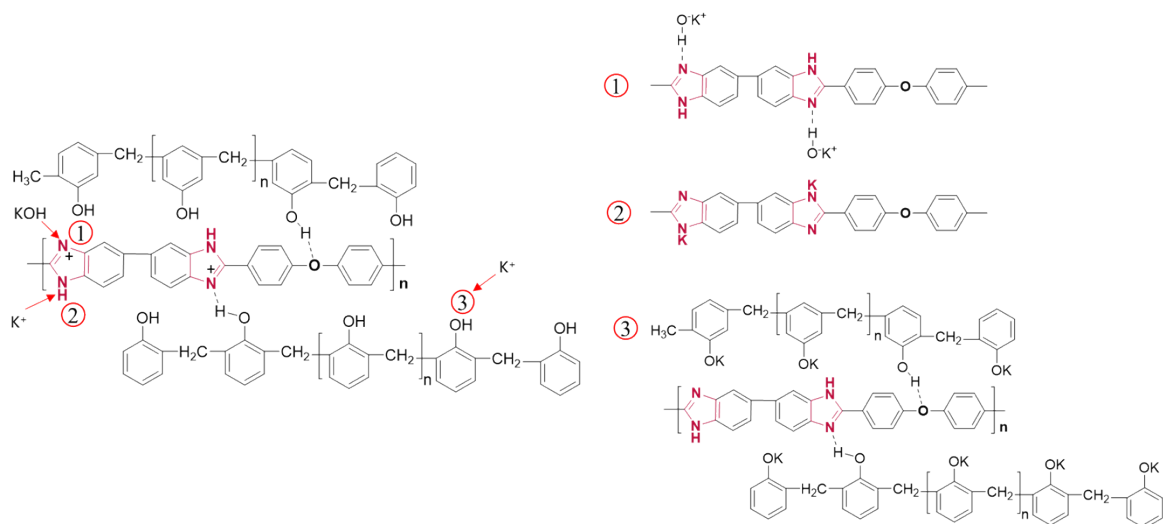

Scheme S2. Three possible combinations between C-PBI/TPPR and KOH.

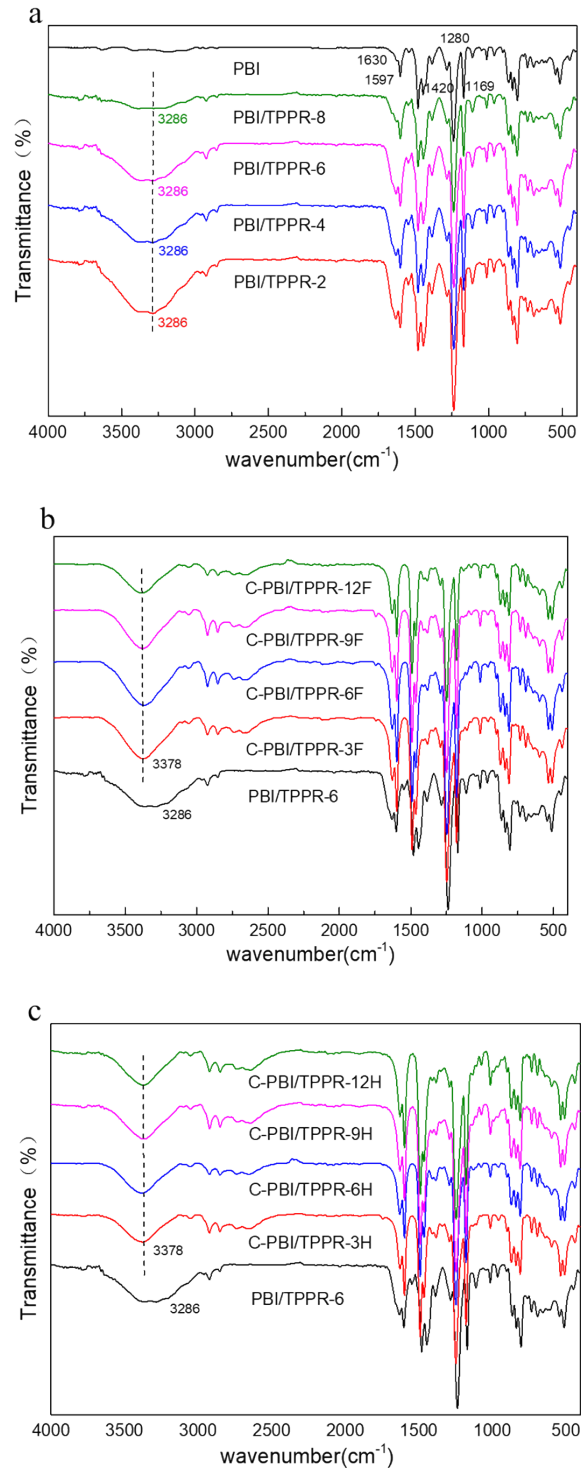

Fig. S1. FTIR spectra of (a) PBI/TPPR-X, (b) C-PBI/TPPR-YF and (c) C-PBI/TPPR-ZH membranes.

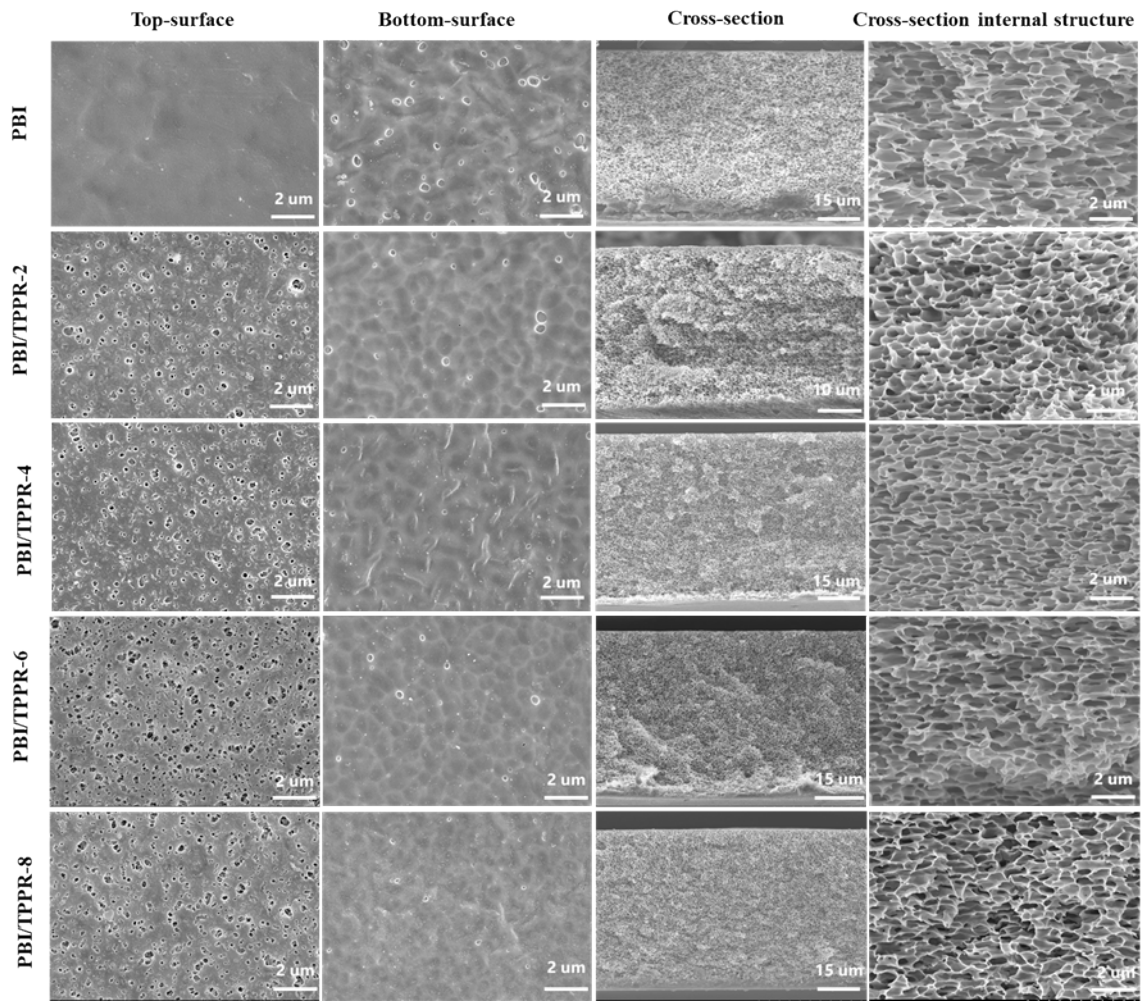

Fig.S2. SEM morphology of PBI, PBI/TPPR-2, PBI/TPPR-4, PBI/TPPR-6, PBI/TPPR-8 membranes

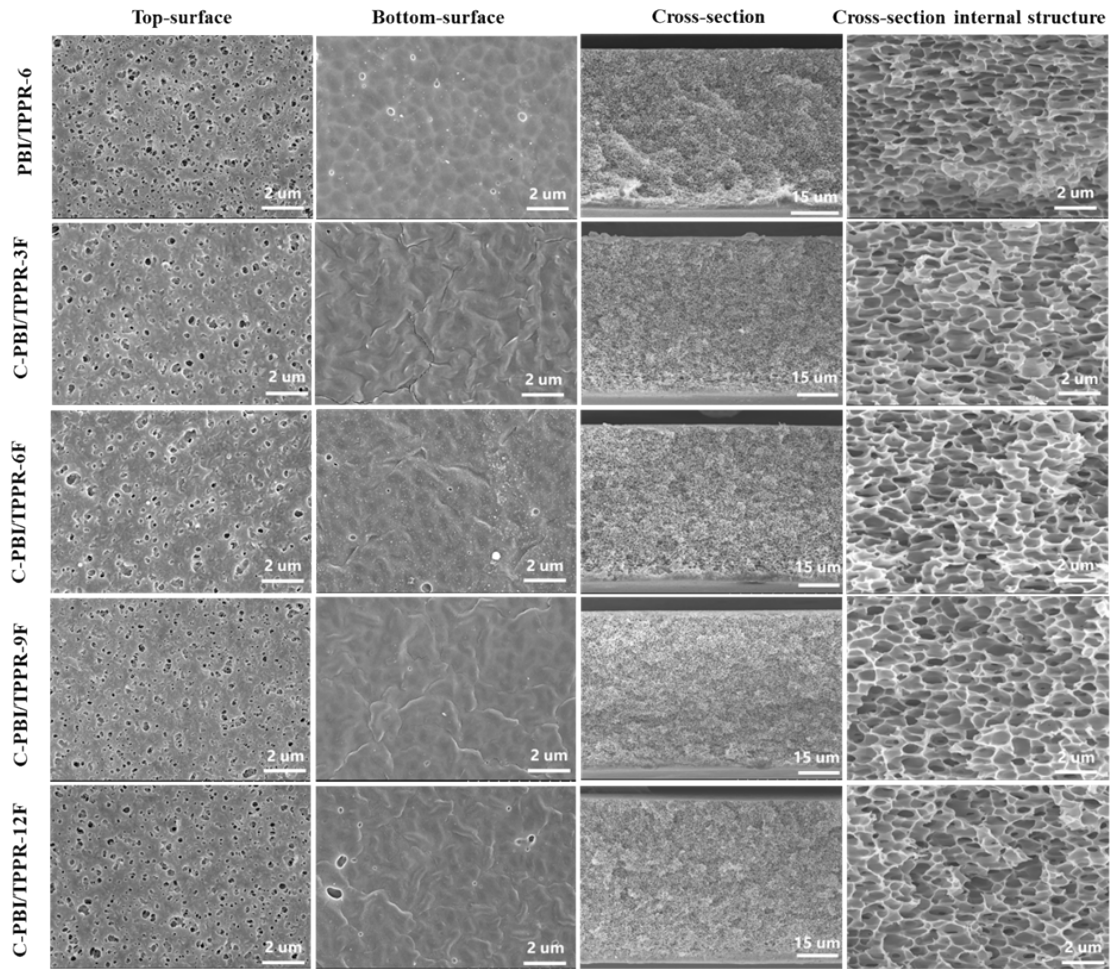

Fig.S3. SEM morphology of PBI/TPPR-6, C-PBI/TPPR-3F, C-PBI/TPPR-6F, C-PBI/TPPR-9F, C-PBI/TPPR-12F membranes

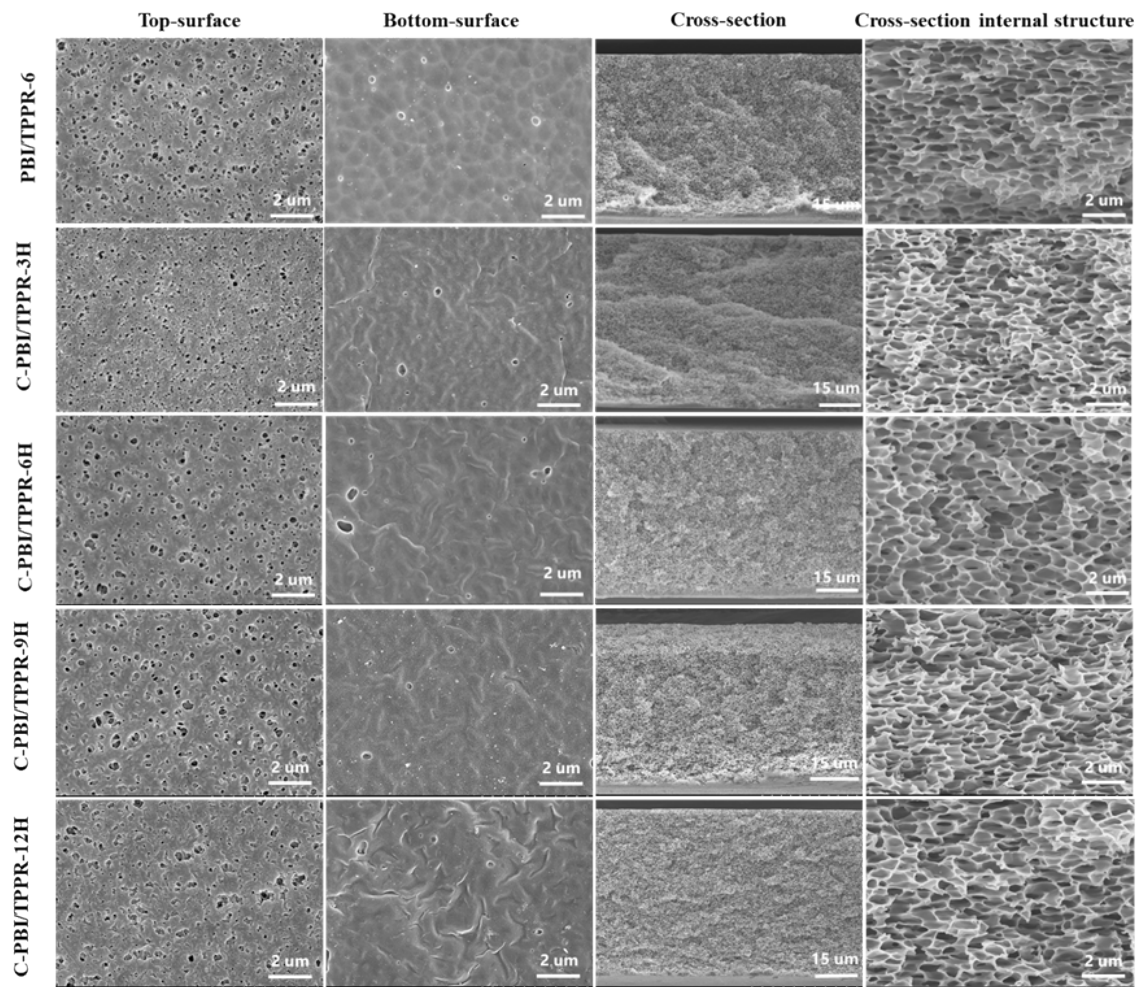

Fig.S4. SEM morphology of PBI/TPPR-6, C-PBI/TPPR-3H, C-PBI/TPPR-6H, C-PBI/TPPR-9H, C-PBI/TPPR-12H membranes

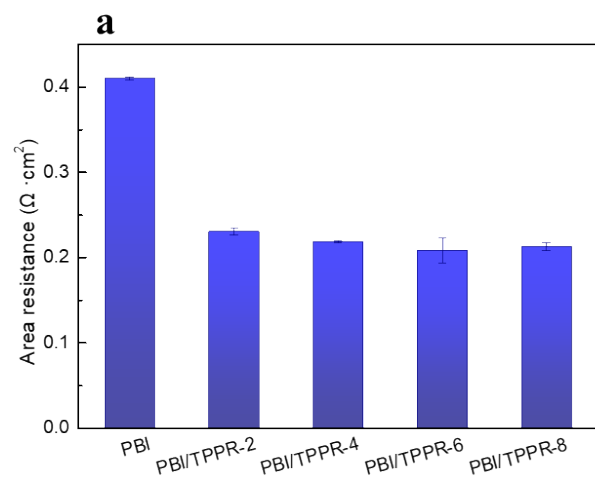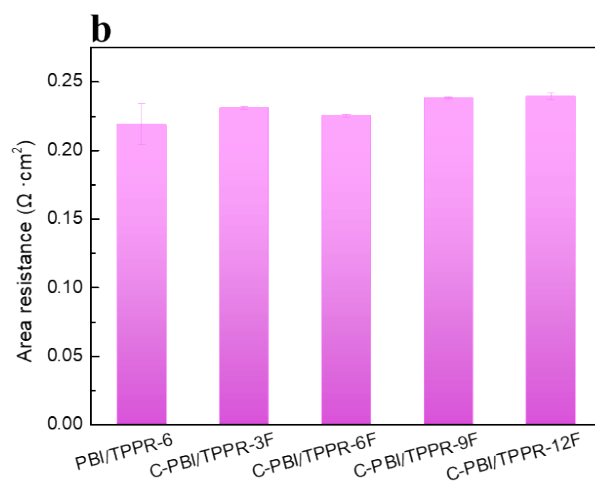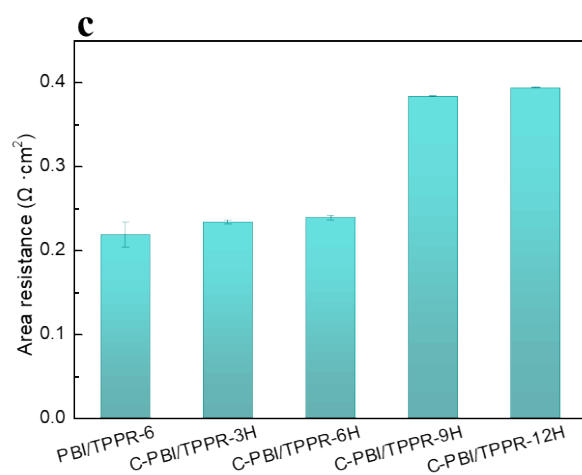

Fig. S5. Area resistance of pristine PBI, PBI/TPPR-X and C- PBI/TPPR-YF membranes in 1M KOH solution



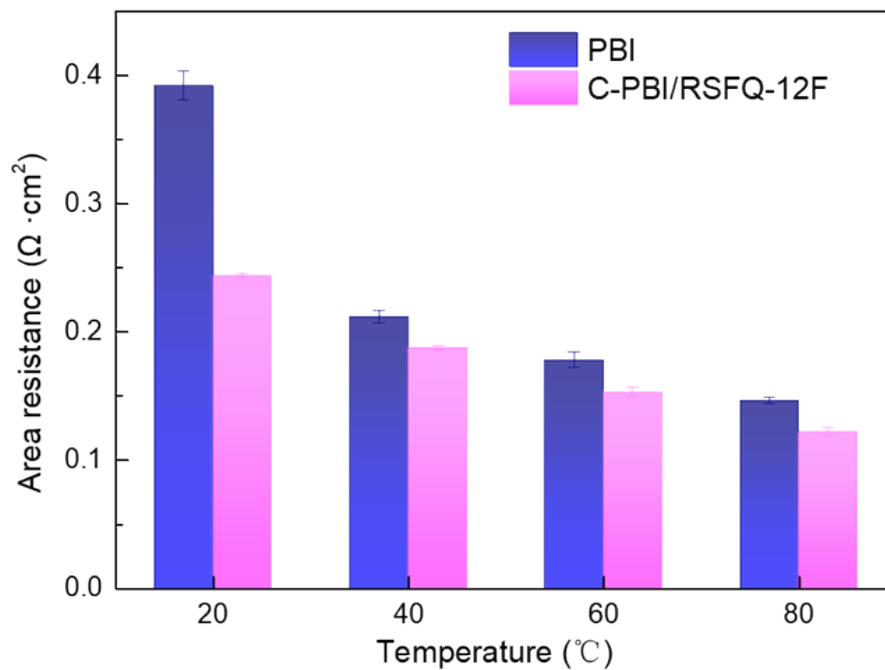

Fig. S6. Area resistance of pristine PBI and C- PBI/TPPR-YF membranes in 1M KOH solution at different temperatures

**a**

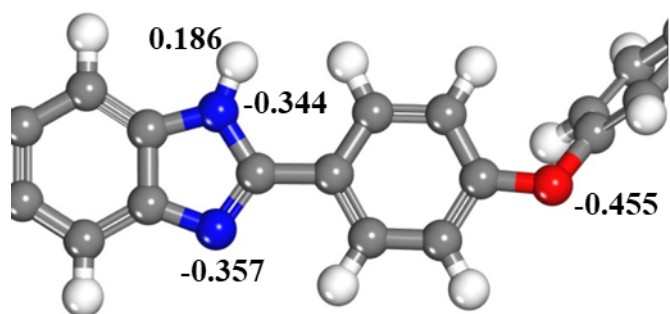

**b**

**PBI**

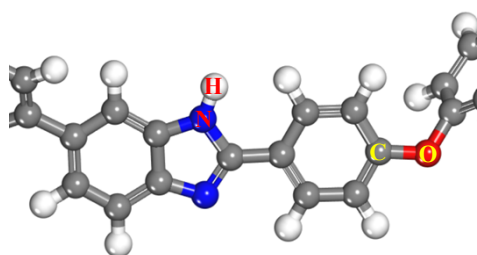

**PBI-K**

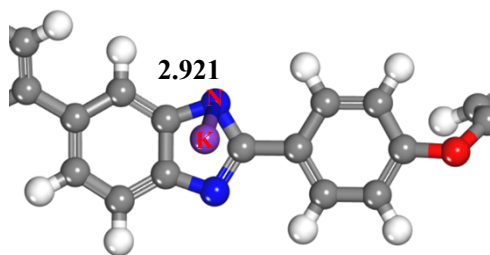

0 kJ/mol

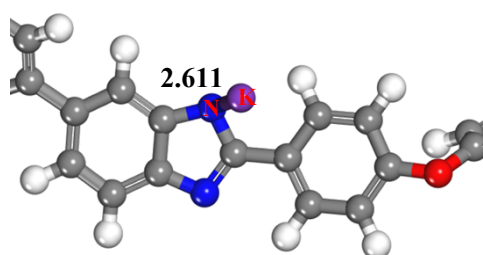

10.98 kJ/mol

**TPPR**

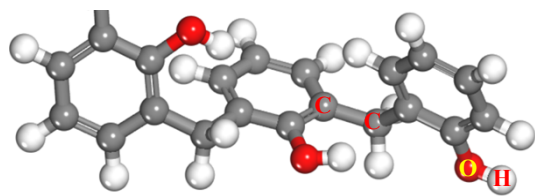

**TPPR-K**

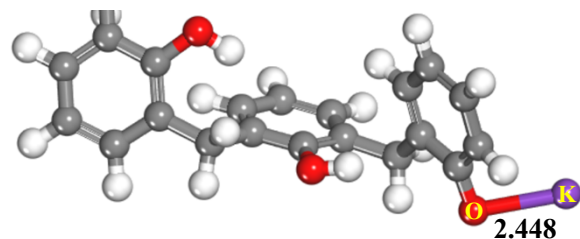

Fig. S7. (a) Mulliken charge distribution and (b) binding energy

Table S1 Binding energy (kJ/mol) and bond length (Å) for PBI, TPPR and related systems

| System            | Chemical bond | Binding energy | Bond length  |
|-------------------|---------------|----------------|--------------|
| <b>PBI</b>        | <b>N-H</b>    | <b>383.31</b>  | <b>1.013</b> |
|                   | C-O           | 314.82         | 1.393        |
| <b>PBI-K</b>      | <b>N-K</b>    | <b>301.74</b>  | <b>2.921</b> |
|                   | <b>O-H</b>    | <b>363.21</b>  | <b>0.976</b> |
| <b>TPPR</b>       | C-O           | 460.13         | 1.387        |
|                   | C-C           | 372.68         | 1.518        |
| <b>TPPR-K</b>     | <b>O-K</b>    | <b>283.55</b>  | <b>2.448</b> |
| <b>PBI...TPPR</b> | N...H-O       | 67.05          | 1.717        |
|                   | O...H-O       | 35.66          | 1.788        |
|                   | NH... O       | 33.72          | 2.090        |

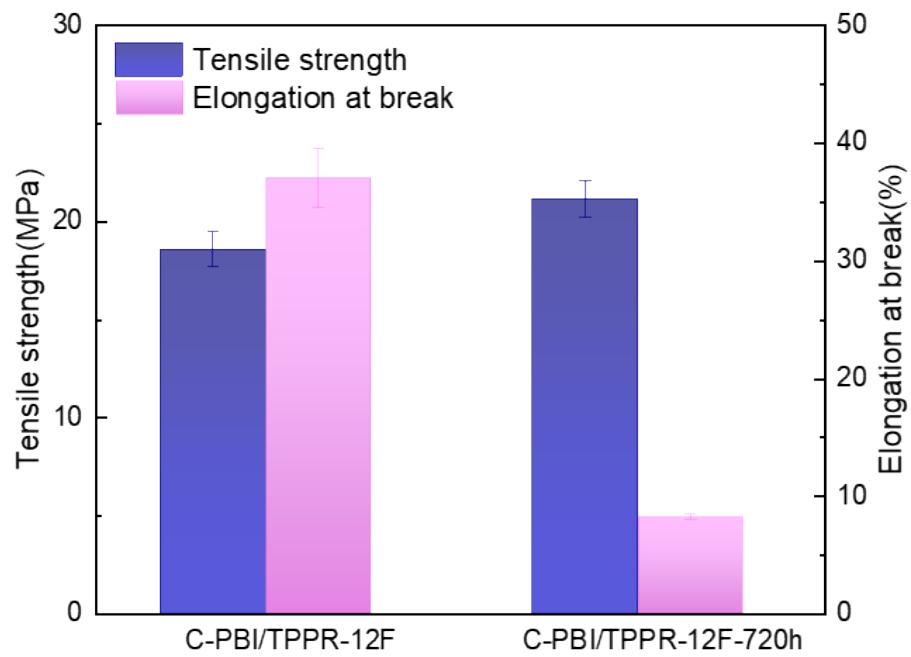

Fig. S8. Stress-strain behavior of C-PBI/TPPR-12F membrane before and after 720 h alkaline treatment

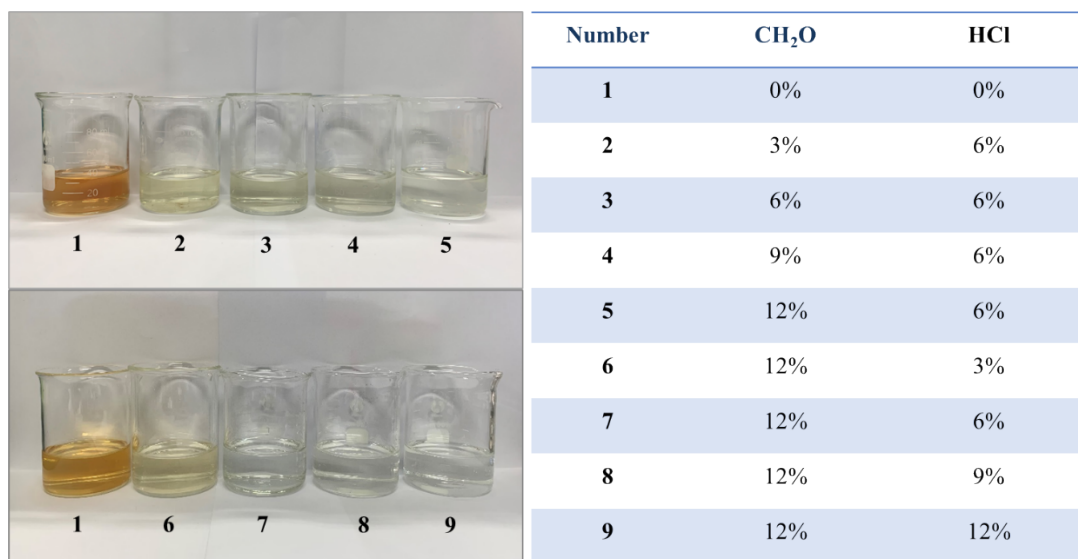

Fig. S9. Chemical stability of C-PBI/TPPR membranes cross-linked with different concentrations of formaldehyde and hydrochloric acid

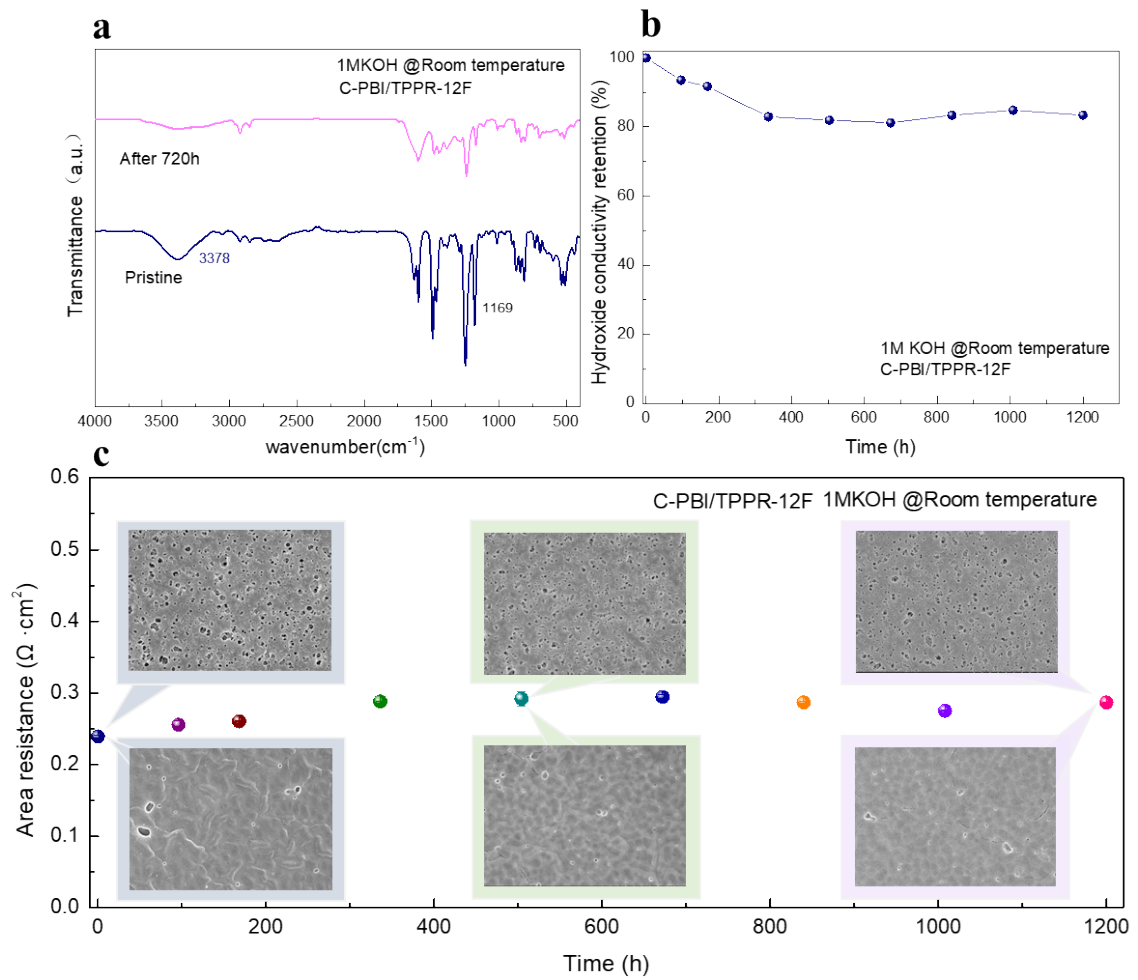

Fig.S10. Alkaline stability of the C-PBI/TPPR-12F membrane in 1 M KOH at Room temperature: (a) ATR-FTIR spectra, (b) hydroxide conductivity remaining; (c) SEM surface morphology before and after 720 h alkaline treatment and change in area resistance during 720h.

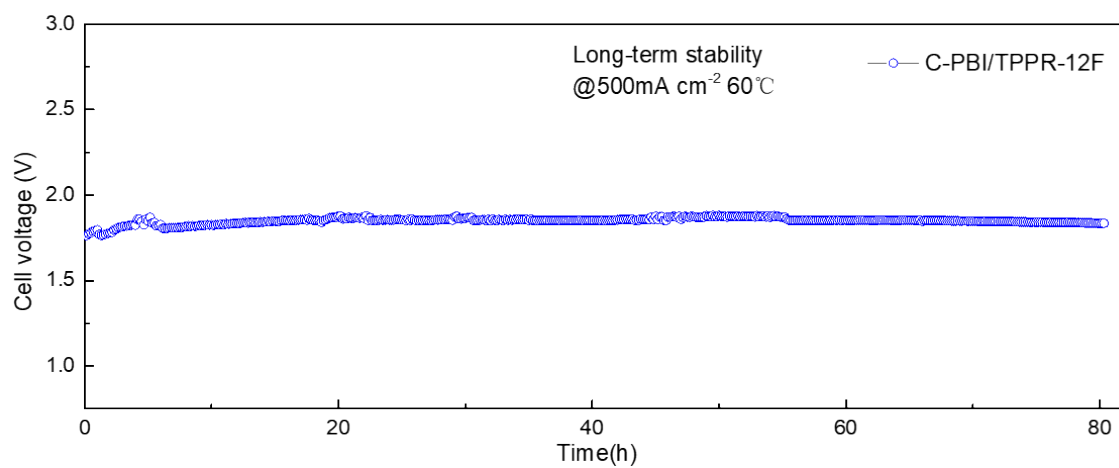

Fig. S11. Chemical stability of C-PBI/TPPR membranes cross-linked with different concentrations of formaldehyde and hydrochloric acid

Table S2 Surface composition of pristine PBI, PBI/TPPR-6 and C- PBI/TPPR-12F membrane determined by XPS analysis.

| Name           | C1s   | N1s   | O1s   | O1s/ C1s (%) | N1s/ C1s (%) |
|----------------|-------|-------|-------|--------------|--------------|
| PBI            | 74.96 | 10.09 | 14.95 | 19.94        | 13.46        |
| PBI/TPPR-6     | 72.52 | 7.12  | 20.37 | 28.09        | 9.82         |
| C-PBI/TPPR-12F | 80.08 | 3.86  | 16.05 | 20.04        | 4.82         |



Table S3 Surface composition of C-PBI/TPPR-12F composite membranes before and after alkaline stability test by XPS analysis.

| Name                                                         | C1s   | N1s  | O1s   | K2p  | O1s/ C1s<br>(%) | N1s/ C1s<br>(%) |
|--------------------------------------------------------------|-------|------|-------|------|-----------------|-----------------|
| C-PBI/TPPR-12F-<br>after 720h<br>(1MKOH Room<br>temperature) | 75.32 | 6.01 | 15.35 | 3.32 | 20.38           | 7.98            |
| C-PBI/TPPR-12F-<br>after 720h<br>(3MKOH 80°C)                | 76.02 | 8.53 | 13.61 | 1.84 | 17.90           | 11.22           |
